# Supplementary material
Source: PubMed Central journal article supplement (PMC7028995)
Supplement: 41437_2019_288_MOESM1_ESM.pdf [file 41437_2019_288_MOESM1_ESM.pdf]

Supplemental Table 1.

Isolates of *Puccinia triticina* genotyped for SNP variation with Sequence by Genotype method and phenotyped for virulence on 20 Thatcher wheat differential lines

| Continental Population | Country                   | Number of isolates | Years                  | Collector                                                     |
|------------------------|---------------------------|--------------------|------------------------|---------------------------------------------------------------|
| North America (NA)     | USA                       | 58                 | 1984-2005              | D. Long, J. Kolmer                                            |
|                        | Canada                    | 12                 | 1959-1997              | D. J. Samborski, J. Kolmer                                    |
|                        | Mexico                    | 3                  | 2005                   | J. Huerta                                                     |
| Central Asia (CA)      | Azerbaijan                | 4                  | 2003                   | A. Morgounov                                                  |
|                        | Kazakhstan                | 36                 | 2002, 2004             | A. Morgounov, J. Kolmer                                       |
|                        | Uzbekistan                | 6                  | 2003                   | A. Morgounov                                                  |
|                        | Armenia                   | 2                  | 2003                   | A. Morgounov                                                  |
|                        | Tajikistan                | 9                  | 2003                   | A. Morgounov                                                  |
|                        | Kyrgyzstan                | 3                  | 2003                   | A. Morgounov                                                  |
|                        | Georgia                   | 1                  | 2003                   | A. Morgounov                                                  |
| New Zealand (NZ)       | -                         | 10                 | 1997                   | R. McKenzie                                                   |
| South Africa (SAF)     | -                         | 21                 | 1996, 1998, 2012       | Z. Pretorius                                                  |
| Russia (RU)            | -                         | 44                 | 2006-2010              | M. A. Mustafina, N. S. Zhemchuzhina                           |
| China (CN)             | -                         | 65                 | 2009, 2010             | College of Plant Protection, Agricultural University of Hebei |
| Pakistan (PK)          |                           | 38                 | 2010, 2011, 2013, 2014 | J. Mirza                                                      |
| Europe (EU)            | Czech Republic - Slovakia | 17                 | 1994, 2009             | A. Hanzalova, P. Bartos                                       |
|                        | United Kingdom            | 30                 | 1980-2009              | R. Johnson, R. Bayles                                         |
|                        | Turkey                    | 30                 | 2009                   | J. Kolmer, A. Morgounov, Z. Mert                              |
|                        | Ukraine                   | 1                  | 2009                   | A. Morgounov                                                  |
|                        | France                    | 10                 | 2004                   | H. Goyeau                                                     |
|                        | Spain                     | 12                 | 1994, 2016             | D. Rubiales, M. Aoun, F. Martinez-Moreno                      |
|                        | Italy                     | 12                 | 1994, 2006             | F. Cassulli, P. Mantovani, Produttori Sementi Bologna         |
|                        | Germany                   | 2                  | 1994                   | U. Walther                                                    |
|                        | Hungary                   | 3                  | 1994                   | K. Manninger                                                  |
| Middle East (ME)       | Egypt                     | 28                 | 1998-2000              | D. Long, D. McVey                                             |

|                    |           |    |                        |                       |
|--------------------|-----------|----|------------------------|-----------------------|
|                    | Israel    | 18 | 1994, 2000, 2009       | J. Manisterski        |
|                    | Turkey    | 6  | 1988, 1989             | J. Huerta             |
|                    |           |    |                        |                       |
| South America (SA) | Uruguay   | 33 | 1985, 1996, 2004-2006  | S. German             |
|                    | Brazil    | 7  | 1996                   | A. Barcellos          |
|                    | Argentina | 4  | 2004, 2006             | S. German             |
|                    | Peru      | 5  | 1981, 1982, 1987       | D. Long               |
|                    | Chile     | 14 | 1981, 1984, 1988, 2008 | D. Long, R. Madariaga |
| East Africa (EA)   | Ethiopia  | 18 | 1989, 2011, 2012       | J. Huerta, M. Acevedo |
|                    | Kenya     | 7  | 2010, 2011             | R. Wanyera            |

Supplemental Table 2. Jost's  $D$  (top diagonal) and  $F_{ST}$  values (bottom diagonal) between 11 regional populations of *Puccinia triticina*.

|               | Central Asia | China                | East Africa          | Europe               | Middle East          | North America        | New Zealand          | Pakistan             | Russia               | South Africa         | South America        |
|---------------|--------------|----------------------|----------------------|----------------------|----------------------|----------------------|----------------------|----------------------|----------------------|----------------------|----------------------|
| Central Asia  |              | $3.0 \times 10^{-4}$ | $6.0 \times 10^{-4}$ | $1.0 \times 10^{-4}$ | $4.0 \times 10^{-4}$ | $6.0 \times 10^{-4}$ | $3.0 \times 10^{-4}$ | $1.0 \times 10^{-4}$ | $1.0 \times 10^{-4}$ | $2.0 \times 10^{-4}$ | $6.0 \times 10^{-4}$ |
| China         | 0.0653       |                      | $5.0 \times 10^{-4}$ | $2.0 \times 10^{-4}$ | $3.0 \times 10^{-4}$ | $6.0 \times 10^{-4}$ | $2.0 \times 10^{-4}$ | $2.0 \times 10^{-4}$ | $5.0 \times 10^{-4}$ | $2.0 \times 10^{-4}$ | $6.0 \times 10^{-4}$ |
| East Africa   | 0.1297       | 0.0940               |                      | $2.0 \times 10^{-4}$ | $1.0 \times 10^{-4}$ | $5.0 \times 10^{-4}$ | $1.0 \times 10^{-4}$ | $2.0 \times 10^{-4}$ | $1.1 \times 10^{-3}$ | $2.0 \times 10^{-4}$ | $4.0 \times 10^{-4}$ |
| Europe        | 0.0351       | 0.0494               | 0.0539               |                      | $1.0 \times 10^{-4}$ | $4.0 \times 10^{-4}$ | $1.0 \times 10^{-4}$ | 0.0                  | $5.0 \times 10^{-4}$ | $1.0 \times 10^{-4}$ | $4.0 \times 10^{-4}$ |
| Middle East   | 0.0868       | 0.0677               | 0.0275               | 0.0326               |                      | $3.0 \times 10^{-4}$ | 0.0                  | $1.0 \times 10^{-4}$ | $8.0 \times 10^{-4}$ | $1.0 \times 10^{-4}$ | $3.0 \times 10^{-4}$ |
| North America | 0.1483       | 0.1285               | 0.1055               | 0.0963               | 0.0697               |                      | $1.0 \times 10^{-4}$ | $3.0 \times 10^{-4}$ | $7.0 \times 10^{-4}$ | $3.0 \times 10^{-4}$ | 0.0                  |
| New Zealand   | 0.1103       | 0.0763               | 0.0537               | 0.0473               | 0.0305               | 0.0706               |                      | $1.0 \times 10^{-4}$ | $7.0 \times 10^{-4}$ | 0.0                  | $2.0 \times 10^{-4}$ |
| Pakistan      | 0.0362       | 0.0550               | 0.0613               | 0.0102               | 0.0294               | 0.0926               | 0.0582               |                      | $4.0 \times 10^{-4}$ | $1.0 \times 10^{-4}$ | $3.0 \times 10^{-4}$ |
| Russia        | 0.0466       | 0.1106               | 0.2112               | 0.0897               | 0.1692               | 0.1937               | 0.1828               | 0.1043               |                      | $6.0 \times 10^{-4}$ | $7.0 \times 10^{-4}$ |
| South Africa  | 0.1033       | 0.0786               | 0.0610               | 0.0459               | 0.0510               | 0.1246               | 0.0215               | 0.06303              | 0.1800               |                      | $4.0 \times 10^{-4}$ |
| South America | 0.1505       | 0.1319               | 0.1030               | 0.0963               | 0.0743               | 0.0124               | 0.0756               | 0.0909               | 0.1984               | 0.1322               |                      |

Supplemental Table 3. Frequency (%) of isolates in SBG groups with virulence to 20 Thatcher lines of wheat with single genes for leaf rust resistance.

| Virulence | SBG Group <sup>a</sup> |   |      |       |      |       |      |       |       |      |      |       |      |       |       |
|-----------|------------------------|---|------|-------|------|-------|------|-------|-------|------|------|-------|------|-------|-------|
|           | A                      | B | C    | D     | E    | F     | G    | H     | I     | J    | K    | L     | M    | N     | O     |
| Lr1       | 2.6                    | 0 | 0.0  | 0.0   | 35.3 | 88.5  | 100  | 100.0 | 49.2  | 31.6 | 86.5 | 42.9  | 96.0 | 82.4  | 50.0  |
| Lr2a      | 0.0                    | 0 | 0.0  | 0.0   | 20.6 | 48.1  | 98.0 | 100.0 | 16.9  | 15.3 | 52.7 | 0.0   | 6.7  | 0.0   | 0.0   |
| Lr2c      | 28.9                   | 0 | 68.4 | 100.0 | 91.2 | 82.7  | 98.0 | 100.0 | 94.9  | 85.7 | 56.8 | 28.6  | 12.0 | 88.2  | 50.0  |
| Lr3       | 7.9                    | 0 | 0.0  | 100.0 | 55.9 | 88.5  | 98.0 | 42.9  | 100.0 | 96.9 | 86.5 | 28.6  | 97.3 | 64.7  | 50.0  |
| Lr9       | 0.0                    | 0 | 0.0  | 0.0   | 0.0  | 0.0   | 19.6 | 0.0   | 0.0   | 0.0  | 12.2 | 0.0   | 6.7  | 5.9   | 0.0   |
| Lr16      | 7.9                    | 0 | 36.8 | 7.7   | 17.6 | 0.0   | 5.9  | 14.3  | 30.5  | 27.6 | 16.2 | 14.3  | 8.0  | 0.0   | 25.0  |
| Lr24      | 0.0                    | 0 | 0.0  | 0.0   | 11.8 | 0.0   | 0.0  | 14.3  | 0.0   | 1.0  | 36.5 | 0.0   | 21.3 | 0.0   | 0.0   |
| Lr26      | 0.0                    | 0 | 42.1 | 84.6  | 20.6 | 100.0 | 25.5 | 14.3  | 64.4  | 64.3 | 51.4 | 0.0   | 61.3 | 5.9   | 25.0  |
| Lr3ka     | 0.0                    | 0 | 15.8 | 0.0   | 8.8  | 7.7   | 98.0 | 28.6  | 72.9  | 74.5 | 27.0 | 0.0   | 49.3 | 41.2  | 50.0  |
| Lr11      | 2.6                    | 0 | 47.4 | 0.0   | 8.8  | 46.2  | 39.2 | 57.1  | 10.2  | 6.1  | 43.2 | 14.3  | 5.3  | 35.3  | 25.0  |
| Lr17      | 2.6                    | 0 | 26.3 | 38.5  | 5.9  | 42.3  | 98.0 | 100.0 | 100.0 | 69.4 | 27.0 | 28.6  | 90.7 | 23.5  | 50.0  |
| Lr30      | 0.0                    | 0 | 0.0  | 0.0   | 8.8  | 7.7   | 92.2 | 28.6  | 96.6  | 65.3 | 28.4 | 0.0   | 46.7 | 23.5  | 25.0  |
| LrB       | 71.1                   | 0 | 78.9 | 100.0 | 85.3 | 86.5  | 58.8 | 28.6  | 88.1  | 95.9 | 20.3 | 14.3  | 92.0 | 64.7  | 75.0  |
| Lr10      | 89.5                   | 0 | 89.5 | 100.0 | 79.4 | 44.2  | 56.9 | 14.3  | 81.4  | 84.7 | 81.1 | 42.9  | 88.0 | 76.5  | 100.0 |
| Lr14a     | 13.2                   | 0 | 31.6 | 0.0   | 44.1 | 50.0  | 39.2 | 57.1  | 91.5  | 74.5 | 90.5 | 85.7  | 97.3 | 35.3  | 75.0  |
| Lr18      | 0.0                    | 0 | 0.0  | 0.0   | 5.9  | 0.0   | 11.8 | 0.0   | 8.5   | 3.1  | 18.9 | 14.3  | 2.7  | 35.3  | 0.0   |
| Lr3bg     | 10.5                   | 0 | 5.3  | 100.0 | 41.2 | 86.5  | 84.3 | 42.9  | 100.0 | 78.6 | 39.2 | 28.6  | 90.7 | 17.6  | 50.0  |
| Lr14b     | 97.4                   | 0 | 89.5 | 100.0 | 97.1 | 65.4  | 70.6 | 57.1  | 76.3  | 88.8 | 95.9 | 71.4  | 93.3 | 88.2  | 100.0 |
| Lr20      | 84.2                   | 0 | 10.5 | 0.0   | 55.9 | 63.5  | 96.1 | 57.1  | 28.8  | 26.5 | 73.0 | 100.0 | 73.3 | 100.0 | 50.0  |
| Lr28      | 5.3                    | 0 | 0.0  | 0.0   | 23.5 | 5.8   | 0.0  | 71.4  | 0.0   | 2.0  | 93.2 | 42.9  | 10.7 | 94.1  | 25.0  |
| N         | 38                     | 6 | 19   | 13    | 34   | 52    | 51   | 7     | 59    | 98   | 74   | 7     | 75   | 17    | 4     |

<sup>a</sup> Group A = NA Durum, SA Durum, EA Durum, EU Durum, ME Durum

Group B = ETH EEEEE

Group C = EU1

Group D = CN3

Group E = EU5, SAF, NZ

Group F = CN1, CN2

Group G = CA2, RU1, EU6

Group H = NA4, SA1

Group I = CA1, EU2, PK3, RU2

Group J = EU7, ME2, EA2, PK1, CA3, CA4, EU4

Group K = ME1, SA2, NA5

Group L = NA1

Group M = EU8, PK2, EA1, SA3, NA3

Group N = NA2

Group O = SA4

Supplemental Table 4. Isolates in SSR-MLG and SBG groups across regions

| SSR-MLG# | SBG Groups (number of isolates)     |
|----------|-------------------------------------|
| 6        | EU4(7) ME2(1) CA4(1)                |
| 7        | CN1(1) EU7(1)                       |
| 9        | PK1(1)                              |
| 25       | CN1(1) ME2(1) CA1(3) RU2(5) EU2(7)  |
| 33       | NA3(5) EU8 (2) SA3 (4)              |
| 35       | NA3(1)                              |
| 36       | NA3(1) PK2(1) SA3(2) EA1(4) EU8(2)  |
| 39       | NZ(1) SAF(1)                        |
| 41       | NA5(2)                              |
| 42       | NA5(2) ME1(1) SA2(1)                |
| 46       | NA5(15) ME1(10)                     |
| 49       | NA5(2) NZ(1) SA2(1) ME(1)           |
| 52       | EU8(1) EA(1)                        |
| 58       | NA1(2) SA2(1) NZ(1)                 |
| 59       | EU5(2)                              |
| 65       | CN3(2) EU5(3)                       |
| 67       | PK2(1)                              |
| 72       | EA Durum(4) EU Durum(1) ME Durum(1) |
| 75       | EA Durum (1) NA Durum(2)            |
| 77       | ME2(1) EU7(2)                       |
| 79       | NA4(1)                              |
| 82       | SA1(1)                              |
| 83       | PK3(1) EU2(2)                       |
| 84       | CA1(1) EU2(4)                       |
| 92       | ME2(1)                              |
| 99       | ME2(13) EA2(3)                      |
